# Supplementary material
Source: PubMed Central journal article supplement (PMC5964007)
Supplement: NIHMS949767-supplement-1.pdf [file NIHMS949767-supplement-1.pdf]

**Supplementary table 1. Description of previously selected antibiotic-catabolizing soil isolates**

| Isolate name <sup>a</sup> | Prior designation | Organism                                    | Initial selection | β-lactam catabolism |               |
|---------------------------|-------------------|---------------------------------------------|-------------------|---------------------|---------------|
|                           |                   |                                             |                   | Penicillin          | Carbenicillin |
| ABC02                     | CA-S3F-1          | <i>Paraburkholderia caledonica</i> CA-S3F-1 | Carbenicillin     | +                   | +             |
| ABC07                     | PE-S1G-1          | <i>Pseudomonas sp.</i> PE-S1G-1             | Penicillin        | +                   | -             |
| ABC08                     | PE-S2R-1          | <i>Pandoraea sp.</i> PE-S2R-1               | Penicillin        | +                   | -             |
| ABC10                     | PE-S2T-3          | <i>Pandoraea sp.</i> PE-S2T-3               | Penicillin        | +                   | -             |

<sup>a</sup>Data, isolate selection and growth described in Dantas *et al* (2008)<sup>15</sup>

**Supplementary table 2. Total β-lactamase and β-lactamase-like genes identified in ABC strain genomes**

| Ambler class           | ABC02 | ABC07 | ABC08 | ABC10 | Total |
|------------------------|-------|-------|-------|-------|-------|
| Class A                | 1     | 0     | 0     | 0     | 1     |
| Class B                | 0     | 0     | 0     | 0     | 0     |
| Class C                | 5     | 2     | 4     | 4     | 15    |
| Class D                | 0     | 0     | 1     | 1     | 2     |
| Incomplete annotation* | 3     | 8     | 3     | 3     | 17    |
| Total                  | 9     | 10    | 8     | 8     | 35    |

\*Includes β-lactamases without Ambler class identification, and putative β-lactamases annotated as serine proteases or, predominantly, MBL fold metallo-hydrolases

**Supplementary table 3. β-lactamases up-regulated by growth on penicillin in ABC strain genomes**

| Ambler class | ABC02 | ABC07 | ABC08 | ABC10 | Total |
|--------------|-------|-------|-------|-------|-------|
| Class A      | 1     | 0     | 0     | 0     | 1     |
| Class B      | 0     | 0     | 0     | 0     | 0     |
| Class C      | 1     | 2     | 1     | 1     | 5     |
| Class D      | 0     | 0     | 1     | 1     | 2     |
| Total        | 2     | 2     | 2     | 2     | 8     |

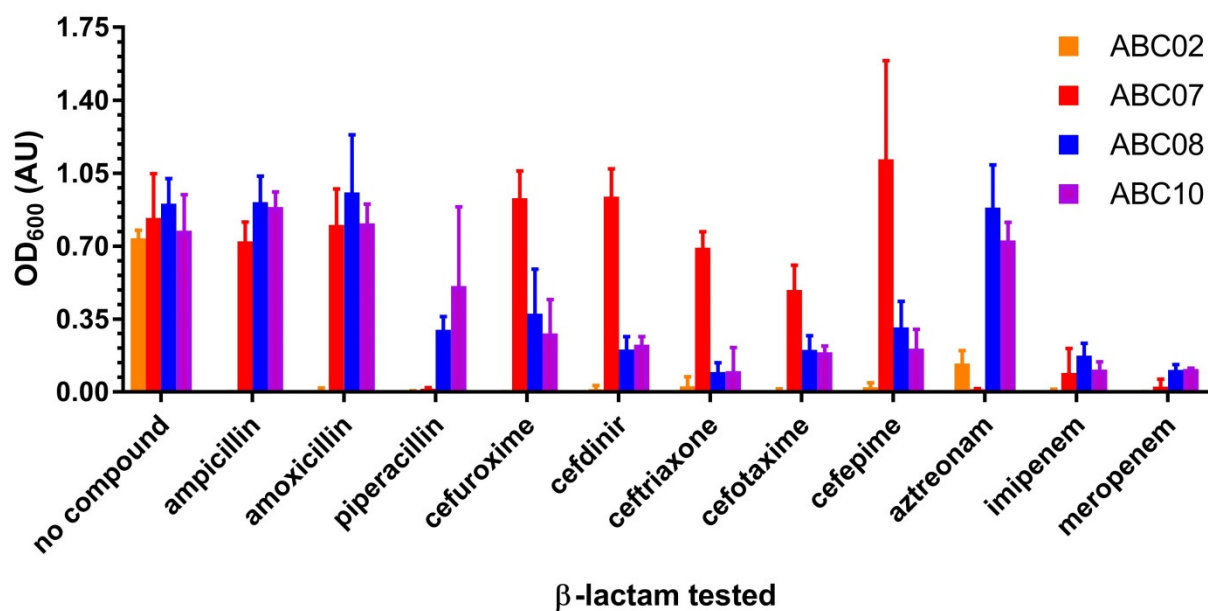

**Supplementary figure 1. ABC strains exhibit multi-class, cross-generational resistance to  $\beta$ -lactam antibiotics**

ABC strains were grown in rich media with 1 g/l  $\beta$ -lactam antibiotics including 3<sup>rd</sup> and 4<sup>th</sup> generation penicillins (ampicillin/amoxicillin and piperacillin respectively), 2<sup>nd</sup>, 3<sup>rd</sup>, and 4<sup>th</sup> generation cephalosporins (cefuroxime, cefdinir/ceftriaxone/cefotaxime, and cefepime respectively), a monobactam (aztreonam) and two carbapenems (imipenem and meropenem). Average culture density measured by OD<sub>600</sub> of three cultures with standard deviation is shown.

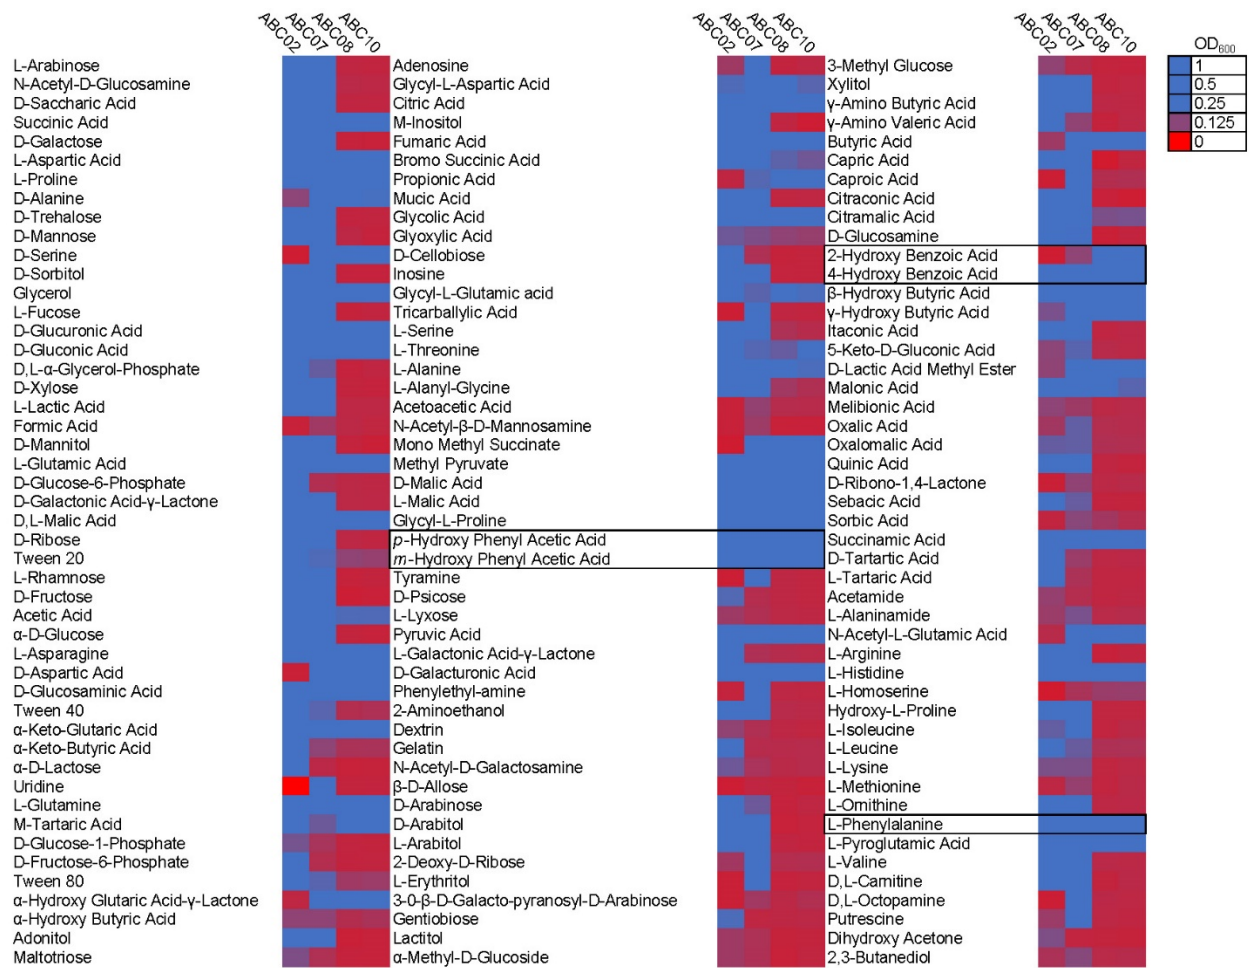

**Supplementary figure 2. ABC strains catabolize diverse substrates including aromatic compounds**

Growth of four ABC strains were assayed on 190 different carbon sources. Only carbon sources for which growth exceeded OD<sub>600</sub> 0.05 for at least one strain are displayed. Aromatic carbon sources are boxed for emphasis.

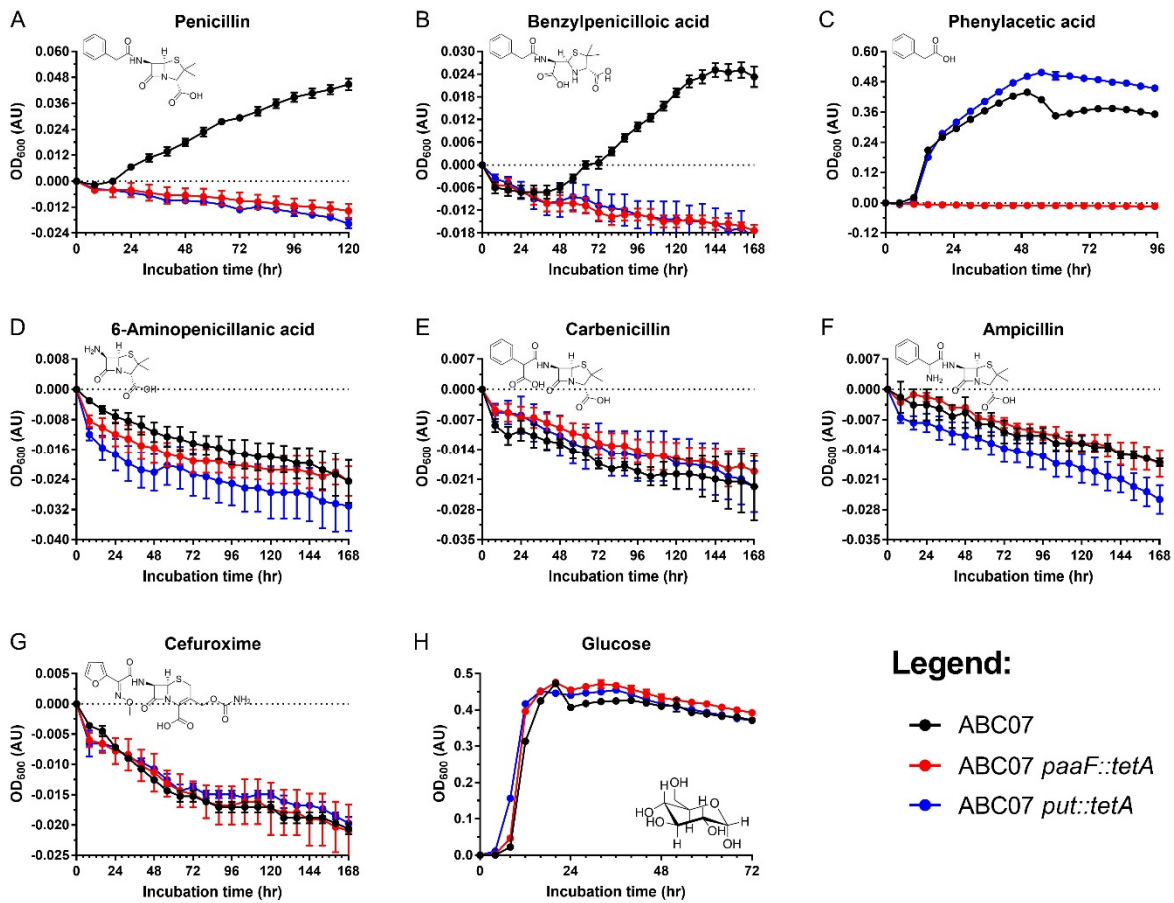

**Supplementary figure 3. Growth of ABC07, *paaF*, and *put* knock-outs on penicillin degradation products and other  $\beta$ -lactam antibiotics**

Growth curves of wild-type ABC07 (black), and *paaF::tetA* (red) and *put::tetA* (blue) strains in minimal media containing (a) penicillin, (b) benzylpenicilloic acid, (c) phenylacetic acid, (d) 6-aminopenicillanic acid, (e) carbenicillin, (f) ampicillin, (g) cefuroxime, or (h) glucose as sole carbon source. Measurements are the average of triplicate cultures with standard error of the mean displayed.

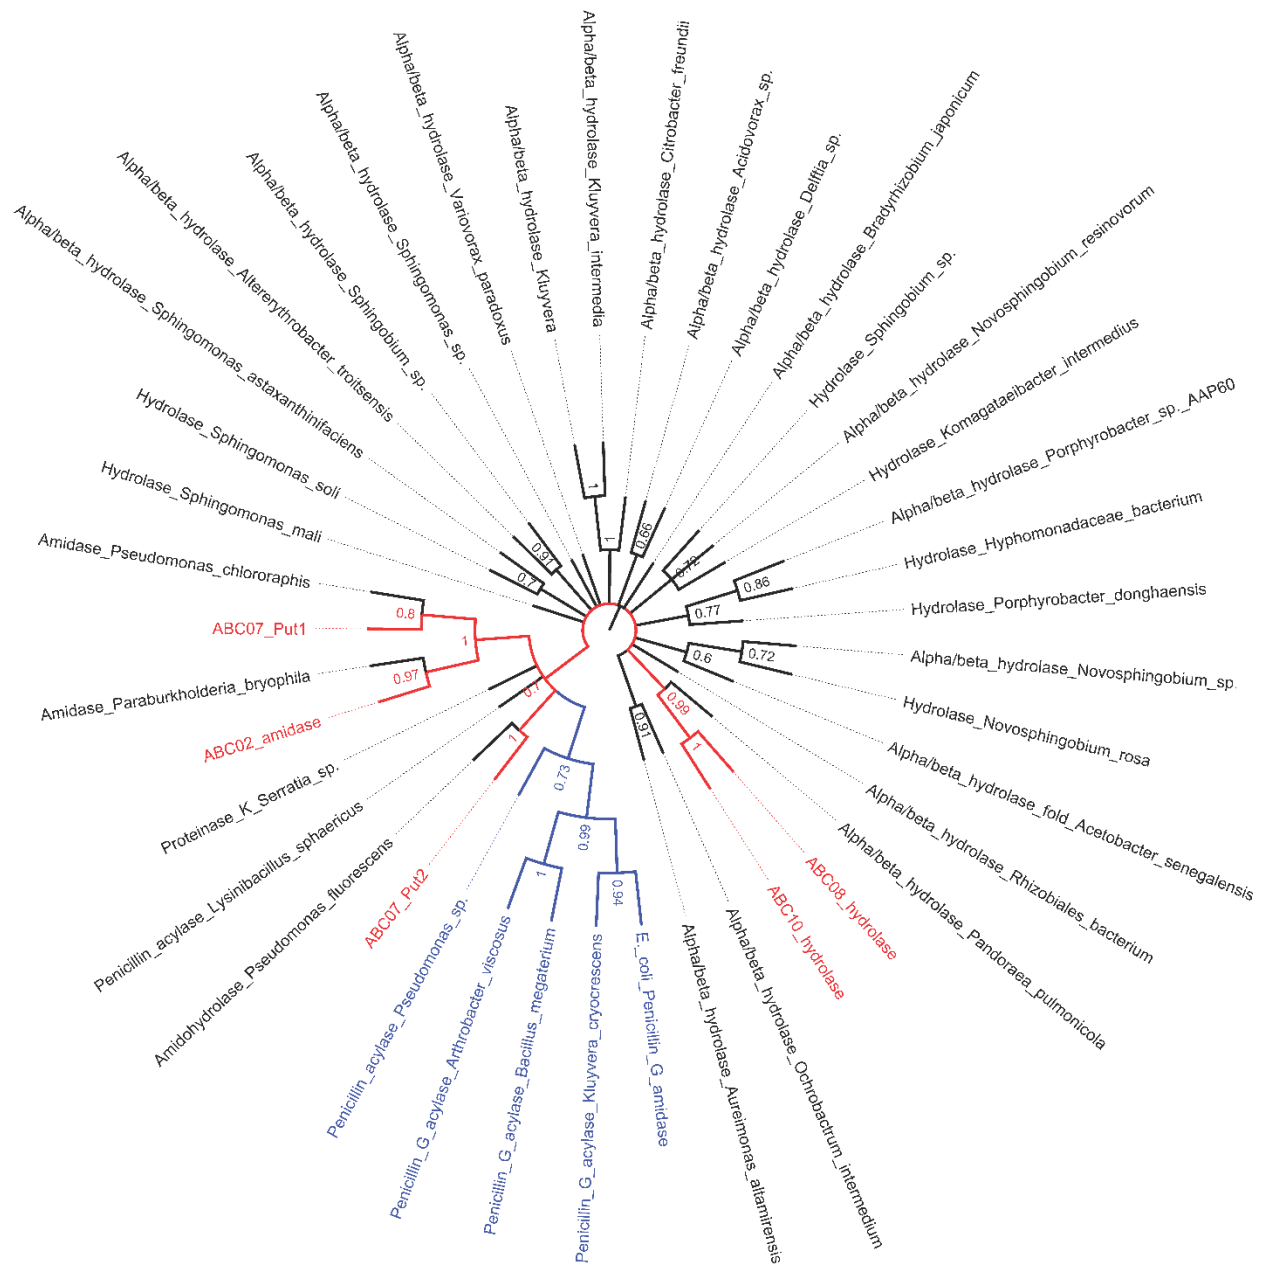

**Supplementary figure 4. Phylogenetic analysis of penicillin-responsive amidases, amidohydrolases, and hydrolases from ABC strains compared to penicillin amidases**  
 Maximum Likelihood tree of penicillin amidase amino acid sequences (shown in blue), including *E. coli* penicillin amidase and penicillin-upregulated amidase, amidohydrolase, and hydrolase amino acid sequences from ABC strains (shown in red). Node support is given by bootstrap fraction.

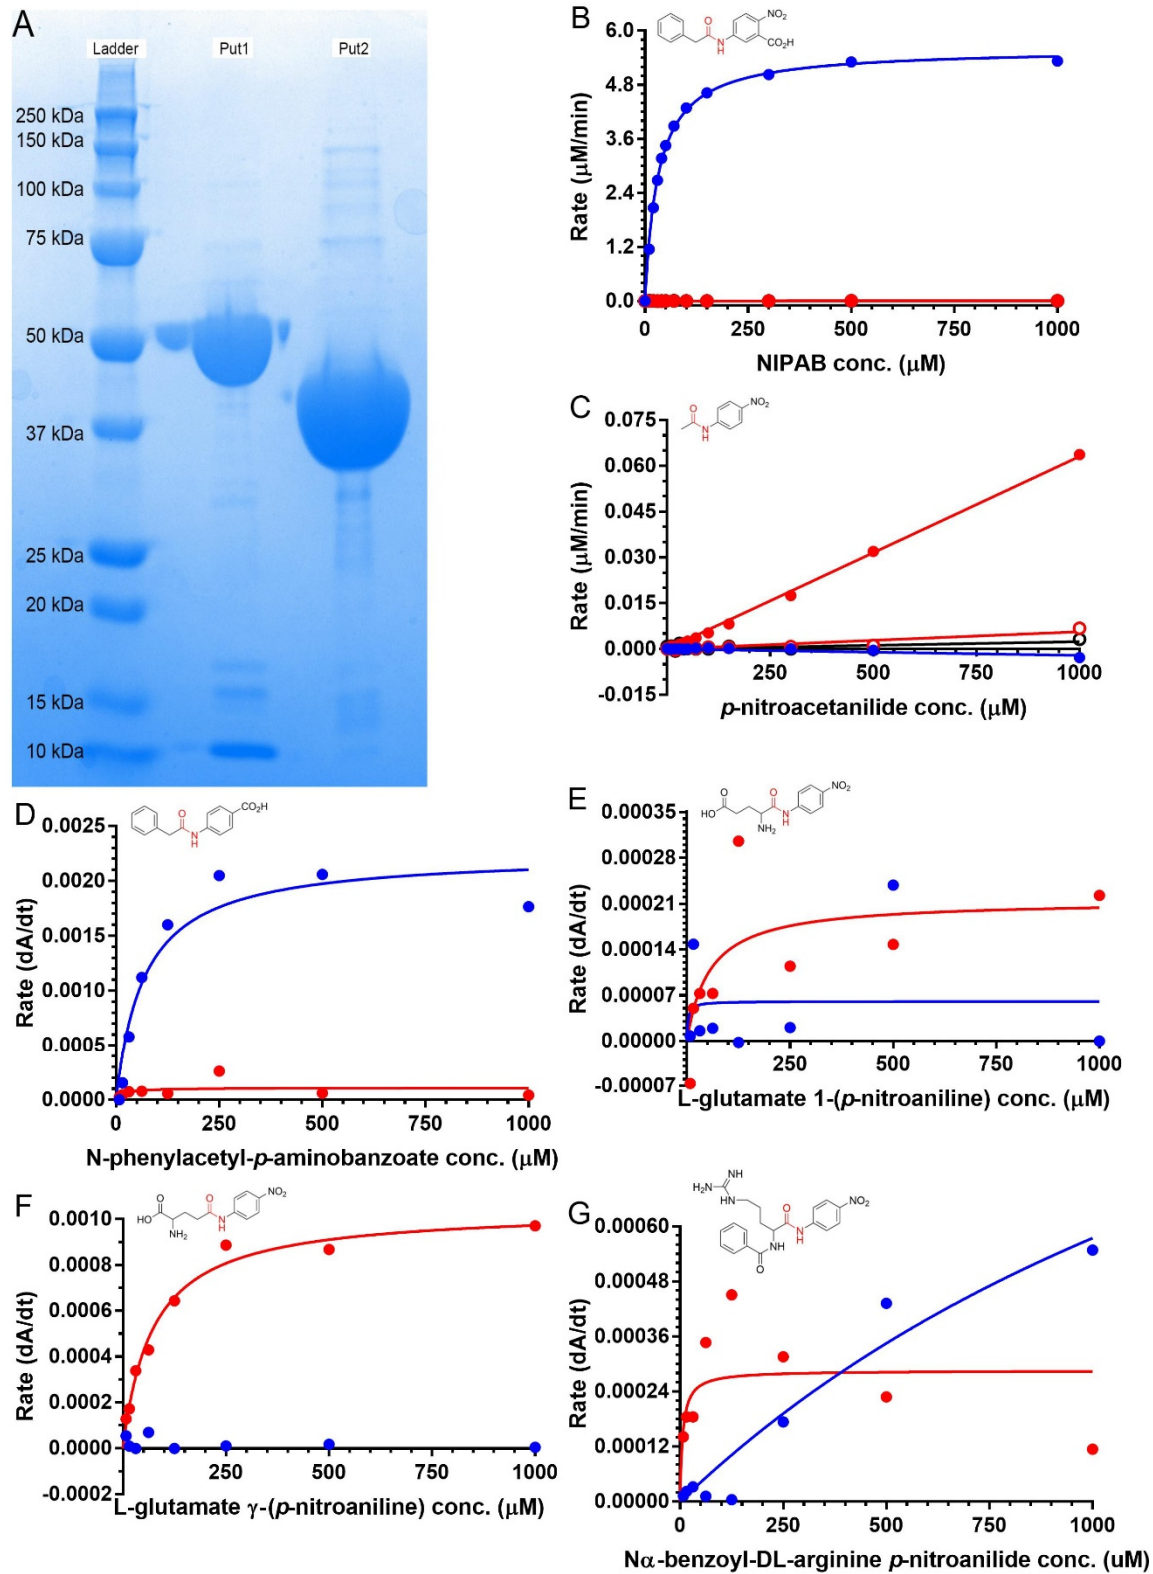

**Supplementary figure 5. *In vitro* characterization of ABC07 Put1 and Put2 from *E. coli* overexpression**

(a) SDS-PAGE gel of his-tagged Put1 and Put2 following over expression in *E. coli* and purification by IMAC resin. Expected protein masses are approximately 54.4 kDa and 44.0 kDa for Put1 and Put2 respectively. (b through g) Enzyme kinetic analysis of Put1, Put2 (panels b and c only), commercial *E. coli* penicillin amidase, or no enzyme with (b) 6-nitro-3-(phenylacetamido)benzoic acid (NIPAB) (penicillin amidase  $K_M$  70.12±16.13  $\mu$ M), (c) *p*-nitroacetanilide, (d) N-phenylacetyl-*p*-aminobenzoate (penicillin amidase  $K_M$  68.97±24.45  $\mu$ M), (e) L-glutamate 1-(*p*-nitroaniline), (f) L-glutamate  $\gamma$ -(*p*-nitroaniline) (Put1  $K_M$  73.33±10.53  $\mu$ M), or (g) N $\alpha$ -benzoyl-DL-arginine *p*-nitroaniline (penicillin amidase  $K_M$  1.99±1.93 mM) as substrates.

A

|                        |     | *                        | #                     |                     |
|------------------------|-----|--------------------------|-----------------------|---------------------|
| ABC07 Put1             | 132 | QTYNSVFGTTGNAY-----      | .....                 | VMSLCESALKDFAAL 292 |
| <i>E. coli</i>         | 280 | ANGLAGYPTTSNMWVIGKSKA... | NPQSGYIANWNNSPQKDYPAS | 540                 |
| <i>K. cryocrescens</i> | 280 | ANGLAGYPTTSNMWVIGKNKA... | NPQSGYIANWNNSPQKDYPAS | 539                 |
| <i>B. megaterium</i>   | 256 | EELGLPLKIGSNAAIVGSEKS... | NPKNGYVVWNNKPSKEWVN-  | 519                 |
| <i>A. viscosus</i>     | 256 | EELGLPLKIGSNAAIVGSEKS... | NPKNGYVVWNNKPSKEWVN-  | 519                 |
| <i>Pseudomonas</i> sp. | 230 | GDASDAAGGGSNNWAVAPGRT... | DPPGGLIVTANRRVVADDHP- | 490                 |

B

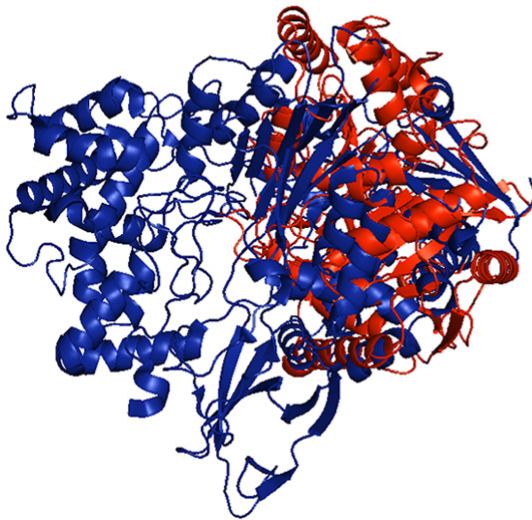

C

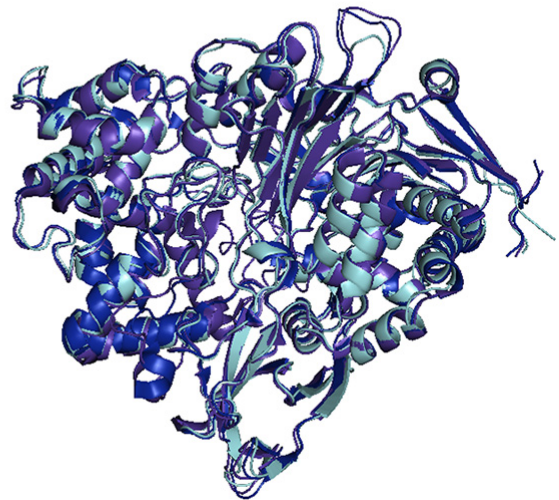

**Supplementary figure 6. Sequence and structural comparison of Put1 with penicillin amidase enzyme family**

(a) Multiple sequence alignment of Put1 enzyme alongside penicillin G amidase homologs. Amino acid residues conserved among penicillin amidases and N-terminal nucleophile hydrolases, the catalytic serine (\*) and the oxyanion hole (#), are highlighted. Overlays and fit (RMSD/aligned residues) of *E. coli* penicillin amidase with (b) the Phyre predicted Put1 three dimensional structure (6.79 Å/88 residues) and (c) penicillin G amidases homologs from *P. rettgeri* (1.71 Å/744 residues), and *K. citrophilia* (1.39 Å/552 residues).

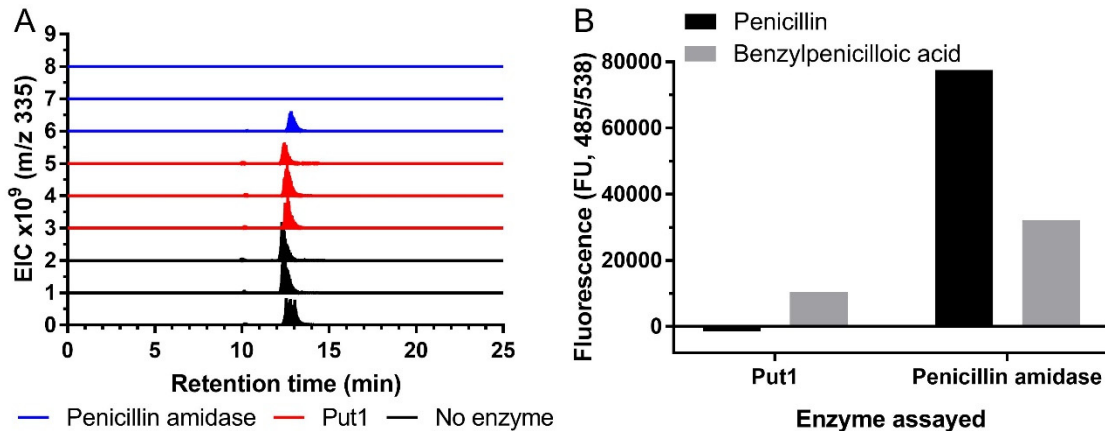

**Supplementary figure 7. Put1 hydrolyzes the amide bond of benzylpenicilloic acid but shows little degradative activity with penicillin**

(a) LCMS analysis of penicillin degradation by *E. coli* penicillin amidase or Put1 by extracted ion count monitoring at 335 m/z corresponding to singly protonated penicillin. Within each condition traces represent (bottom to top) incubation for 30 min, 300 min, and 22.5 hr. (b) Put1 and *E. coli* penicillin amidase were incubated with penicillin or benzylpenicilloic acid as substrates overnight. Hydrolysis of an amide bond (the phenylacetamide bond in penicillin and benzylpenicilloic acid or the  $\beta$ -lactam ring in penicillin) was detected by derivatization of newly revealed amino groups by the reagent NBD-Cl followed by fluorescent quantification.

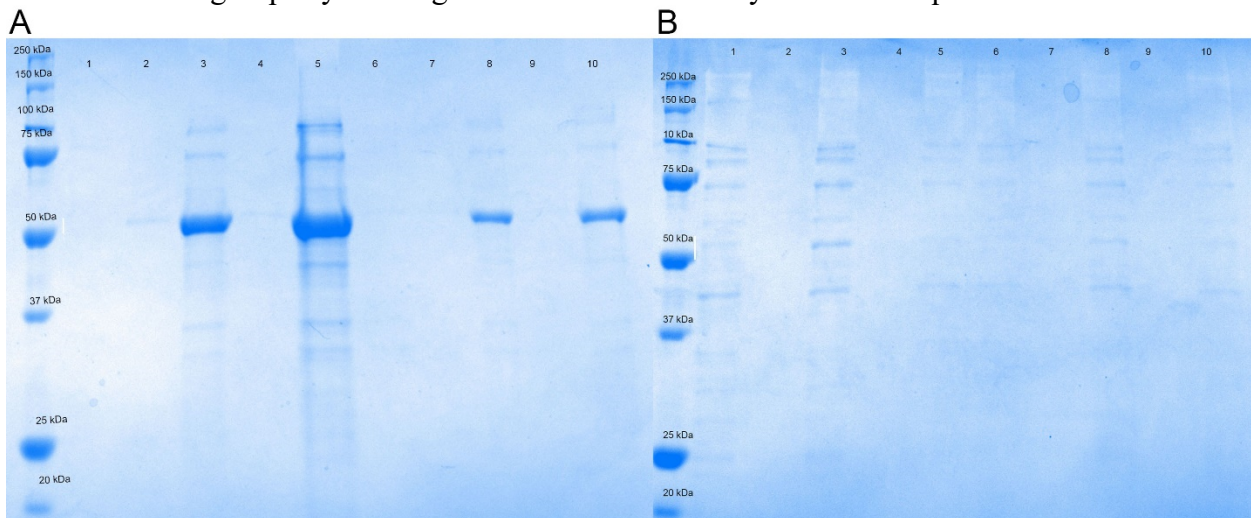

**Supplementary figure 8. Test conditions for the expression and purification of Put1 from *E. coli***

SDS-PAGE gels of (a) insoluble and (b) soluble protein fractions from cell-free extracts of *E. coli* BL21(DE3) cells expressing *put1* on pET28B vector under the following conditions: TB brand MB induced with (1) no IPTG, (2) 100  $\mu$ M IPTG at inoculation, (3) 100  $\mu$ M IPTG at density, (4) 500  $\mu$ M IPTG at inoculation, (5) 500  $\mu$ M IPTG at density, and TB brand FB induced with (6) no IPTG, (7) 100  $\mu$ M IPTG at inoculation, (8) 100  $\mu$ M IPTG at density, (9) 500  $\mu$ M IPTG at inoculation, and (10) 500  $\mu$ M IPTG at density. For all conditions the majority of Put1 protein (MW 54.4 kDa) is found in the insoluble fraction.
